# Supplementary material for: Validation of the Japan Coma Scale for the prediction of mortality in children: analysis of a nationwide trauma database
Source: HighWire-hosted journal article supplement (doi:10.1136/wjps-2021-000350), 2022-02-01
Supplement: wjps-2021-000350supp002_data_supplement.pdf [file wjps-2021-000350supp002_data_supplement.pdf]

**Supplemental table 2. Vital signs categories by age group.**

| Age Groups                   | Hypotension<br>(mmHg) | Tachypnoea<br>(bpm) | Bradypnoea<br>(bpm) |
|------------------------------|-----------------------|---------------------|---------------------|
| Infants<br>(<1 yo)           | 70+(2*age)            | 53                  | 29                  |
| Toddlers<br>(1-2 yo)         | 70+(2*age)            | 37                  | 21                  |
| Preschoolers<br>(3-5 yo)     | 70+(2*age)            | 28                  | 19                  |
| School-Aged<br>(6-9 yo)      | 70+(2*age)            | 25                  | 17                  |
| Preadolescents<br>(10-12 yo) | 90                    | 25                  | 17                  |
| Adolescents<br>(13-17 yo)    | 90                    | 20                  | 11                  |
