# Supplementary material for: Validation of the Japan Coma Scale for the prediction of mortality in children: analysis of a nationwide trauma database
Source: HighWire-hosted journal article supplement (doi:10.1136/wjps-2021-000350), 2022-02-01
Supplement: wjps-2021-000350supp003_data_supplement.pdf [file wjps-2021-000350supp003_data_supplement.pdf]

## Supplemental Table 3 A

## Odds ratio of JCS for mortality (model A)

| JCS     | Odds ratio | 95% CI          |
|---------|------------|-----------------|
| I-1     | 1.11       | (0.24 - 5.13)   |
| I-2     | 1.89       | (0.24 - 14.9)   |
| I-3     | 9.56       | (3.19 - 28.7)   |
| II-10   | 5.49       | (1.83 - 16.4)   |
| II-20   | 21.8       | (7.67 - 61.9)   |
| II-30   | 10.7       | (2.88 - 39.9)   |
| III-100 | 24.5       | (10.3 - 58.7)   |
| III-200 | 127.5      | (60.9 - 267.0)  |
| III-300 | 447.7      | (219.2 - 914.5) |

## Supplemental Table 3B

## Odds ratio of GCS for mortality (model A)

| GCS | Odds ratio | 95% CI          |
|-----|------------|-----------------|
| 14  | 1.21       | (0.27 - 5.46)   |
| 13  | 4.51       | (1.25 - 16.2)   |
| 12  | 11.4       | (3.61 - 36.2)   |
| 11  | 8.67       | (2.40 - 31.3)   |
| 10  | 12.6       | (3.99 - 40.1)   |
| 9   | 15.1       | (4.75 - 48.0)   |
| 8   | 11.2       | (3.09 - 40.5)   |
| 7   | 37.5       | (16.0 - 87.8)   |
| 6   | 50.7       | (22.0 - 117.0)  |
| 5   | 194.6      | (78.7 - 481.1)  |
| 4   | 283.1      | (127.4 - 629.2) |
| 3   | 450.5      | (231.5 - 876.6) |

## Supplemental Table 3C

## Odds ratio of JCS for mortality (model B)

| JCS          | Odds ratio | 95% CI         |
|--------------|------------|----------------|
| I-1          | 1.92       | (0.35 - 10.6)  |
| I-2          | 2.56       | (0.28 - 23.4)  |
| I-3          | 7.74       | (1.84 - 32.6)  |
| II-10        | 3.63       | (0.78 - 16.9)  |
| II-20        | 23.46      | (6.16 - 89.4)  |
| II-30        | 2.60       | (0.28 - 24.6)  |
| III-100      | 19.38      | (5.90 - 63.7)  |
| III-200      | 54.30      | (17.5 - 169.0) |
| III-300      | 205.10     | (67.9 - 619.4) |
| Age (year)   | 0.95       | (0.90 - 1.00)  |
| Sex (man)    | 0.86       | (0.52 - 1.40)  |
| hypotension  | 15.10      | (7.79 - 29.3)  |
| bradypnea    | 1.32       | (0.67 - 2.62)  |
| tachypnea    | 1.05       | (0.63 - 1.75)  |
| Blunt trauma | 0.75       | (0.09 - 6.57)  |
| ISS          | 1.06       | (1.04 - 1.08)  |

## Supplemental Table 3D

## Odds ratio of GCS for mortality (model B)

| GCS          | Odds ratio | 95% CI         |
|--------------|------------|----------------|
| 14           | 1.65       | (0.33 - 8.31)  |
| 13           | 3.30       | (0.71 - 15.5)  |
| 12           | 4.39       | (0.82 - 23.5)  |
| 11           | 6.08       | (1.41 - 26.3)  |
| 10           | 5.36       | (1.20 - 23.9)  |
| 9            | 6.58       | (1.40 - 30.9)  |
| 8            | 3.74       | (0.68 - 20.7)  |
| 7            | 14.7       | (4.68 - 46.5)  |
| 6            | 16.2       | (5.04 - 51.8)  |
| 5            | 104.9      | (31.0 - 354.7) |
| 4            | 162.7      | (55.4 - 477.2) |
| 3            | 161.7      | (61.7 - 424.2) |
| Age (year)   | 0.96       | (0.91 - 1.01)  |
| Sex (man)    | 0.87       | (0.53 - 1.42)  |
| hypotension  | 17.2       | (8.81 - 33.7)  |
| bradypnea    | 1.13       | (0.56 - 2.27)  |
| tachypnea    | 0.96       | (0.56 - 1.63)  |
| Blunt trauma | 0.85       | (0.09 - 8.41)  |
| ISS          | 1.07       | (1.05 - 1.09)  |

JCS, Japan Coma Scale; GCS, Glasgow Coma Scale; 95% CI, 95% confidence interval; ISS, Injury Severity Score
