# Supplementary figures and images for: Validation of the Japan Coma Scale for the prediction of mortality in children: analysis of a nationwide trauma database
Source: HighWire-hosted journal article supplement (doi:10.1136/wjps-2021-000350), 2022-02-01

A. model A

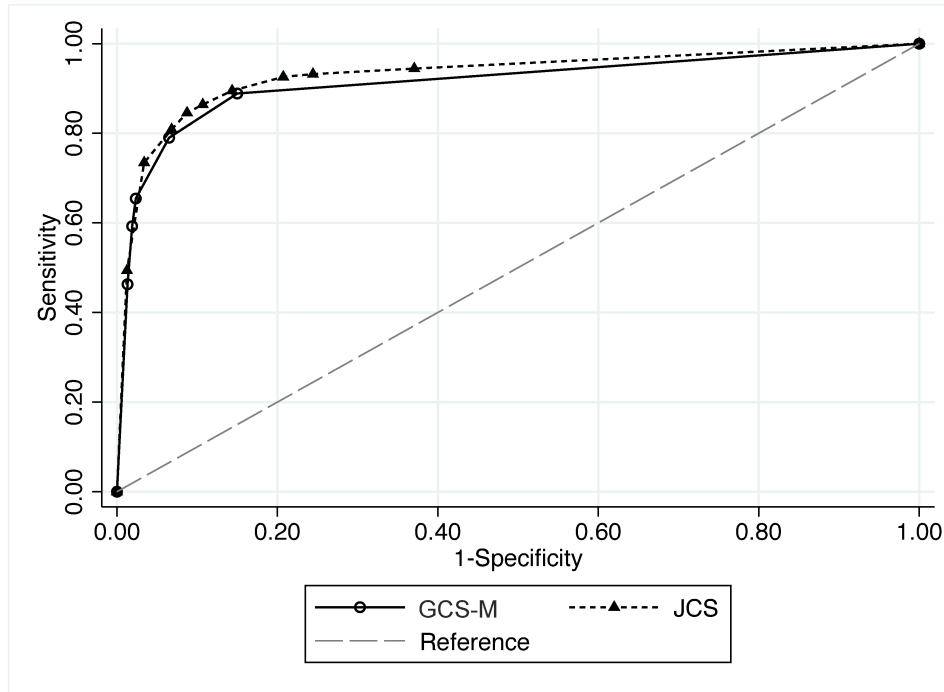

B. model B

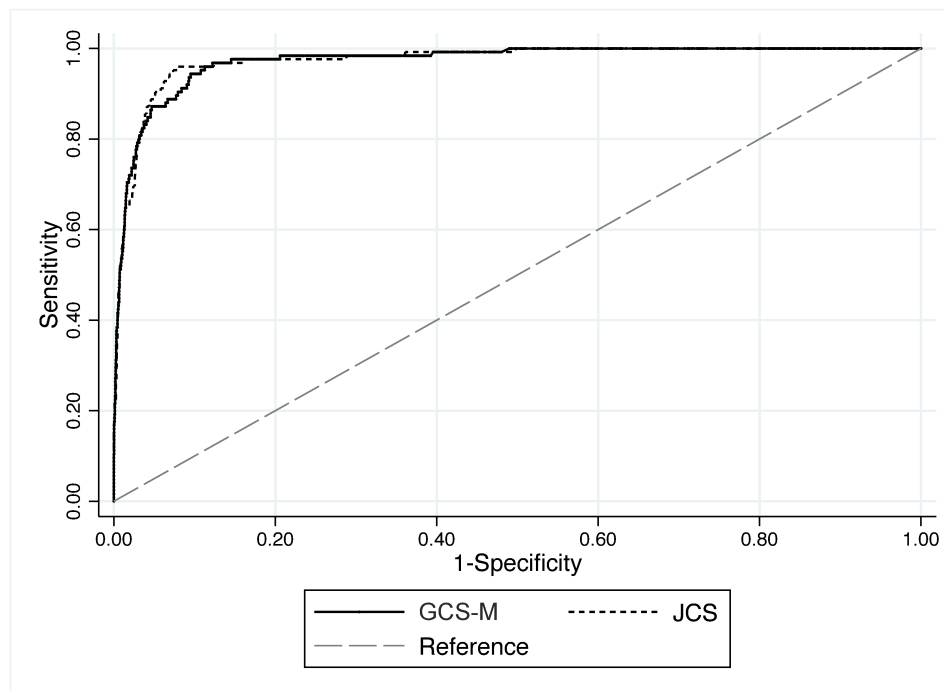

Supplement: wjps-2021-000350supp004_data_supplement.pdf [file wjps-2021-000350supp004_data_supplement.pdf]

## A. M component of the Glasgow Coma Scale (model A)

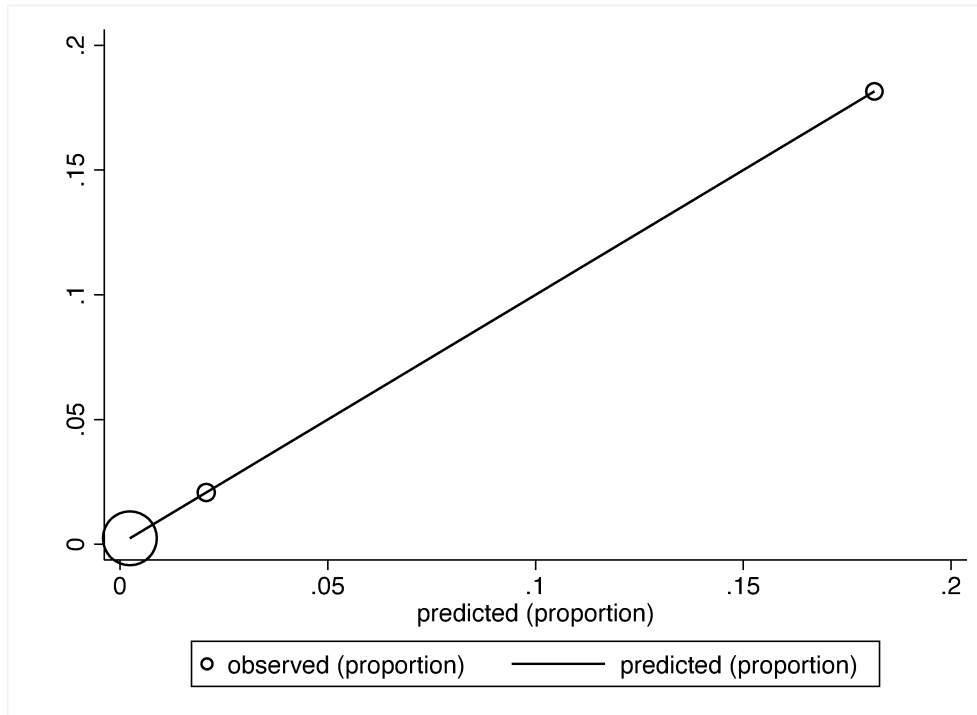

## B. M component of the Glasgow Coma Scale (model B)

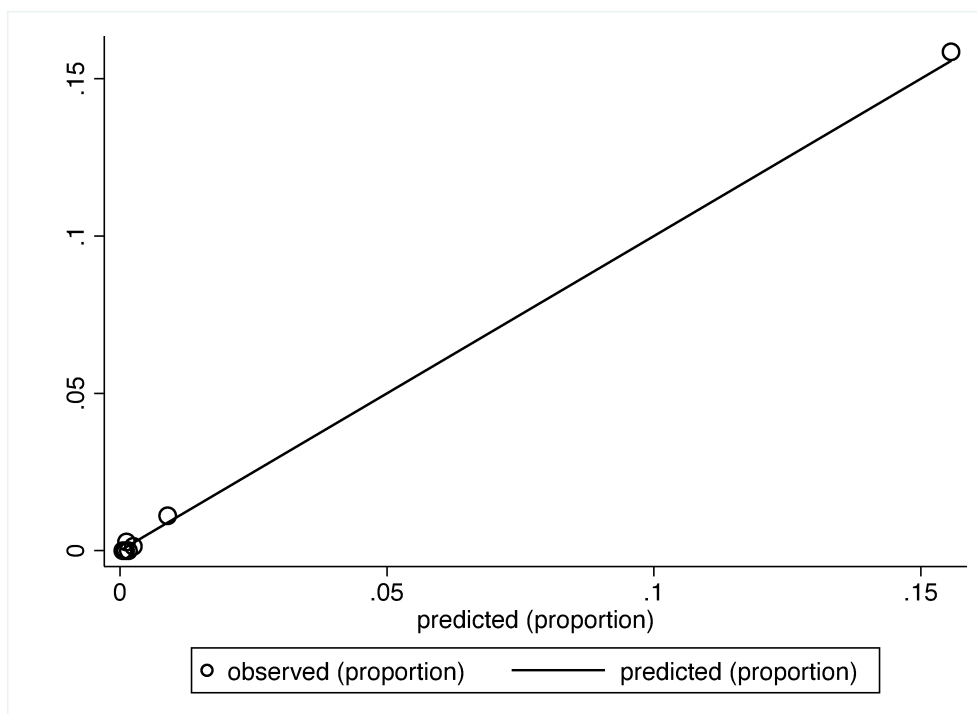

Supplement: wjps-2021-000350supp005_data_supplement.pdf [file wjps-2021-000350supp005_data_supplement.pdf]
